# Supplementary material for: The Feasibility of Anterior Occipital Condyle Screw for the Reconstruction of Craniovertebral Junction: A Digital Anatomical and Cadaveric Study of a Novel Technique
Source: Research Square preprint supplement (doi:10.21203/rs.3.rs-113707/v1), 2020-12-01
Supplement: Supplementary file 1 [file e9786fffe19634b5b19a3841.xlsx]

## Sheet: data of table 1
Age	left Inclination	Left Diverge	Left length	right Inclination	right Diverge	right length
25~30	2.9	22.5	22.7	3.1	23.4	23.4
	3.6	25.6	20.3	2.8	25.6	19.7
	1.4	20	20.9	2.2	20.8	21.5
	5.3	32.2	21.3	4.5	33.2	20.8
	10.9	37.7	24	9.6	36.4	23.5
	8	20.7	23	8.6	21.4	22.1
	5.9	24.4	22	4.4	24.1	23.4
	8.1	26.5	23	9.5	25.3	22.8
	0.8	20	20.4	1.2	19.3	21.1
	4.7	25.6	22.7	3.7	21	20.7
	3.1	28.8	22.8	3.8	30.7	21.8
	4.8	19.5	22.3	5.3	20.3	21.6
	5.5	36	21.2	4.8	35.8	22.4
	5	33.2	21.4	4.5	33.8	21.1
	10.4	18	19.4	9	19.7	20.4
	8.8	27	20.2	8.8	26.6	22.2
30~40	9.1	27.6	22.5	10.8	28.4	23.1
	7.6	25.1	21.6	8.1	25.3	22.5
	1	31.9	21.3	1.5	32.1	22.6
	8.5	29.7	19.6	4.6	30.2	19.1
	8	22.2	20.1	7.3	22.5	19.7
	0.6	37.5	23.2	0.9	36.9	23.2
	11.9	24.6	20.9	11.1	25.6	22.8
	7	37.6	22.8	6.4	37.6	22.5
	7.5	19.8	22	6.2	17.1	22.9
	2.3	28.3	21.8	1.8	27.9	20.9
	3.7	25.9	20.7	3.9	26.1	20.1
40~50	2.3	21.4	20.9	4.3	22.3	21.5
	11.5	36.5	20.7	9.1	35.4	21.5
	8.1	24.6	19.7	6.9	31	19.7
	1	26.1	19.7	1.3	27.1	20.5
	11.5	30.6	21.4	10.3	29.7	20.8
	8.5	23.7	21.3	10.9	24.1	22.1
	2.2	37.5	22	3.1	36.4	21.3
	1.7	30.3	23.3	3.2	31.2	25
	6.5	29.9	21.4	4.9	28.6	22.5
	9.3	25.9	22.2	7.3	26.3	21.8
	10.3	18.6	20.3	11	18.9	19.8
	2.2	17.3	20.5	1.6	18	20.2
	11.4	17.2	22.2	10.5	18.4	22.5

## Sheet: data of table2
model Inclination	model Diverge	model length	specimen Inclination	specimen Diverge	specimen length
5.9	35.6	20.3	5.8	34.7	21.2
5.3	23.4	21.6	5.4	22.1	20.6
6.4	30.4	21.9	6.2	28.7	22.4
6.2	22	22.2	6.5	21.1	21.8
5.2	21.4	21.9	5.4	22.1	22.3
6.4	27.7	21.7	6.3	26.5	21.1
5.7	27.8	21.7	5.4	28.7	22.5
5.1	18.7	21.6	5.3	19.4	23.4
6.4	33.4	22.4	6.1	33.1	20.2
5.9	26.5	20.4	5.4	26.8	21.4
